1  
2  
3  
4  
5  
6  
7  
8  
9  
10  
11  
12  
13  
14  
15  
16  
17  
18  
19  
20  
21  
22  
23  
24  
25  
26  
27

**Validating metabarcoding-based biodiversity assessments with  
multi-species occupancy models: a case study using coastal marine  
eDNA**

Beverly McClenaghan<sup>1\*</sup>, Zacchaeus G. Compson<sup>1</sup>, Mehrdad Hajibabaei<sup>1,2</sup>

<sup>1</sup> Centre for Environmental Genomics Applications, eDNAtec Inc., St. John's, NL, Canada

<sup>2</sup> Centre for Biodiversity Genomics & Department of Integrative Biology, University of Guelph,  
Guelph, ON, Canada

\* Corresponding author. Email: [hajibabaei@gmail.com](mailto:hajibabaei@gmail.com)

28 **Running Title:** Multi-species occupancy models for metabarcoding

29 **Abstract**

30 Environmental DNA (eDNA) metabarcoding is an increasingly popular method for rapid  
31 biodiversity assessment. As with any ecological survey, false negatives can arise during  
32 sampling and, if unaccounted for, lead to biased results and potentially misdiagnosed  
33 environmental assessments. We developed a multi-scale, multi-species occupancy model for the  
34 analysis of community biodiversity data resulting from eDNA metabarcoding; this model  
35 accounts for imperfect detection and additional sources of environmental and experimental  
36 variation. We present methods for model assessment and model comparison and demonstrate  
37 how these tools improve the inferential power of eDNA metabarcoding data using a case study in  
38 a coastal, marine environment. Using occupancy models to account for factors often overlooked  
39 in the analysis of eDNA metabarcoding data will dramatically improve ecological inference,  
40 sampling design, and methodologies, empowering practitioners with an approach to wield the  
41 high-resolution biodiversity data of next-generation sequencing platforms.

42 **Keywords:** environmental DNA, occupancy modelling, DNA metabarcoding, model selection,  
43 marine biomonitoring

44 **Introduction**

45 Environmental DNA (eDNA) as a signal for diversity detection is rapidly advancing. In  
46 freshwater systems, in particular, eDNA is now used as a bioassessment tool in both single-  
47 species qPCR-based studies and in sequencing-based metabarcoding community assessments [1–  
48 3]. Approaches based on eDNA are also gaining traction in the marine environment [4,5].  
49 Oceans are complex, highly diverse, and difficult to sample; therefore, identifying organisms  
50 from all trophic levels and taxonomic groups from a single survey method will greatly facilitate

51 rapid, consistent biodiversity surveys [6]. eDNA metabarcoding provides a streamlined method  
52 of biodiversity assessment, generating high-resolution biodiversity data with time and effort  
53 savings during sample collection and analysis [7,8].

54 However, there are several levels of uncertainty associated with eDNA sampling for  
55 community assessments. The potential for false negatives during sampling, where a species  
56 present in the environment is not detected in surveys, can bias results [9]. False negatives can  
57 occur during field sampling and during lab processing. If imperfect detection is not accounted  
58 for, this could lead to biased estimates of species richness and individual species occupancy  
59 [10,11]. Accounting for false negatives will improve community-wide species occurrence  
60 estimates based on eDNA surveys and yield more robust ecological conclusions for making  
61 management decisions and informing sampling designs. Optimal sampling designs for eDNA  
62 metabarcoding studies are not well-established and differ from traditional ecological sampling  
63 methods in the cost and effort required for sample collection [12]. Additionally, there are several  
64 added variables that need to be accounted for in metabarcoding studies compared to traditional  
65 sampling approaches, such as sequencing depth and marker selection, which vary between  
66 studies and can affect metabarcoding results [5,13,14]. Sampling designs should be  
67 experimentally informed and optimized specifically for eDNA metabarcoding methods [15], yet  
68 this is seldom practiced, and these added sources of variation during sample processing are  
69 seldom considered in the same analysis as sampling design.

70 Occupancy modelling is a powerful tool to account for the additional sources of variation  
71 associated with next-generation biomonitoring approaches, and it has been used to assess  
72 imperfect detection in terrestrial bioassessment [16–18]. These models include 2-levels: the  
73 probability that a species occurs at a site (occupancy;  $\psi$ ) and the probability of detecting a

74 species at a site (probability of detection;  $p$ ). Recently, occupancy models have been adapted for  
75 single-species eDNA studies, where occupancy refers to the probability of a species' DNA  
76 occurring at a site, probability of detection refers to the probability of detecting a species in a  
77 PCR replicate, and an additional stochastic level is added to assess the probability of capturing a  
78 species' eDNA in a field sample (probability of capture,  $\Theta$ ; [19,20]) The use of occupancy  
79 models in single-species eDNA studies is not ubiquitous, but it is increasing [21].

80       Occupancy modelling can also be applied to whole communities through multi-species  
81 occupancy models, which are commonly applied to traditional surveys in terrestrial systems  
82 [22,23], yet seldom used in the context of DNA metabarcoding (Supporting Information 1). In  
83 the same way that single-species models were adapted for eDNA studies through the inclusion of  
84 an additional stochastic level, multi-species models can be adapted for metabarcoding by  
85 including this additional level. Modeling communities together in a single multi-species model  
86 can improve the accuracy and predictive ability of occupancy models compared to single-species  
87 models [24]. Application of multi-species, multi-scale occupancy models to metabarcoding data  
88 are rare, focusing on small-scale lab manipulations [25], and no studies have implemented this  
89 modelling approach to improve sampling designs in natural systems (but see [26] for a single  
90 species example). Incorporating these models routinely in metabarcoding analysis will improve  
91 ecological inferences and species richness estimates, as well as facilitate the development of  
92 robust sampling designs for a relatively new technique where little thought has been dedicated to  
93 developing de novo sampling methods distinct from traditional sampling methods. The inclusion  
94 of covariates in occupancy models at each process level extends the application of the model,  
95 enabling discrimination between sources of variation in sampling effort and environmental

96 factors. However, making conclusions based on models with covariates requires methods of  
97 model assessment and selection for multi-species, multi-scale models.

98 Here, we demonstrate how multi-species occupancy modelling can be used for the  
99 analysis of community biodiversity data resulting from eDNA metabarcoding and highlight the  
100 potential of these models for both improving methodologies and sound ecological inference. We  
101 present methods for model assessment and model comparison adapted for multi-scale, multi-  
102 species occupancy models. Finally, we demonstrate how these tools can improve inferential  
103 power from eDNA metabarcoding results using a case study in a coastal, marine environment.

## 104 **Material & Methods**

### 105 *Model Formulation*

#### 106 **The multi-species, multi-scale occupancy model**

107 We used a Bayesian modeling framework to develop a multi-species, hierarchical  
108 occupancy model with three stochastic levels: occupancy ( $\psi$ ), probability of capture ( $\Theta$ ), and  
109 probability of detection ( $p$ ) (Figure 1). The occupancy process describes whether sampling sites  
110 are occupied or not by a given species' DNA. For eDNA sampling, there are often two levels of  
111 sampling replication within each site (e.g. [20,27]): biological replicates are samples collected  
112 from a single site in the field and technical replicates are repeated samples taken from a single  
113 biological replicate in the lab. The probability of capture refers to the probability that a species'  
114 DNA is collected in a sample, given that the species was present at the site. The probability of  
115 detection refers to the probability that a species was detected in a technical replicate, given that  
116 the species' DNA was collected in the sample. This model assumes no false positives occur in  
117 the data. While false positives may be a possibility in metabarcoding data [15], we used strict

118 bioinformatic filtering to reduce this possibility (see *Bioinformatics* below). Further comments  
119 on false positives can be found in the *Discussion*.

120 **Figure 1** - Schematic illustration of the three stochastic levels included in the multi-scale, multi-  
121 species occupancy model.

122

123 This model can be fit to a dataset,  $y_{ijrk}$ , which is a binary indicator of whether a species  $k$   
124 ( $k = 1, 2, \dots, K$ ) was detected (1) or not detected (0) in a technical replicate  $r$  ( $r = 1, 2, \dots, R$ ) from a  
125 given sample  $j$  ( $j = 1, 2, \dots, J$ ) at a given site  $i$  ( $i = 1, 2, \dots, I$ ). The model consists of three coupled  
126 Bernoulli trials to describe a four-dimensional array of data  $y_{ijrk}$ .

127 
$$z_{ik} \sim \text{Bernoulli}(\psi_k)$$

128 
$$w_{ijk}|z_{ik} \sim \text{Bernoulli}(\Theta_{ijk}z_{ik})$$

129 
$$y_{ijrk}|w_{ijk} \sim \text{Bernoulli}(p_{ijrk}w_{ijk})$$

130 The first random variable  $z_{ik}$  describes the detection ( $z_{ik} = 1$ ) or non-detection ( $z_{ik} = 0$ ) of  
131 species  $k$  at site  $i$  as a function of the occupancy probability  $\psi_k$ . The second random variable  $w_{ijk}$   
132 describes the detection ( $w_{ijk} = 1$ ) or non-detection ( $w_{ijk} = 0$ ) of species  $k$  in sample  $j$  at site  $i$  as a  
133 function of the probability of capture ( $\Theta_{ijk}$ ) and the occupancy state ( $z_{ik}$ ).

134 Covariates can be included in the model at each stochastic level (e.g.,  $\alpha_1, \alpha_2, \alpha_3$ ).

135 Continuous covariates were z-score standardized to have a mean of zero and a standard deviation  
136 of one to help with model convergence. Categorical covariates can also be included at any level,  
137 which is demonstrated below at the probability of detection level (i.e.,  $\alpha_4$ ). Covariates are  
138 included in the model as follows:

139 
$$\text{logit}(\psi_{ik}) = \text{lpsi}_k + \beta_{1k} * \alpha_{1i} + \dots$$

140 
$$\text{logit}(\Theta_{ijk}) = \text{ltheta}_k + \beta_{2k} * \alpha_{2ij} + \dots$$

141 
$$\text{logit}(p_{ijrk}) = \text{lp}_{k\alpha 4(ijr)} + \beta 3_k * \alpha 3_{ijr} + \dots$$

142 For multi-species occupancy models, species coefficients arise from additional  
143 community-level parameters:

144 
$$\text{lpsi}_k \sim N(\mu_{\text{lpsi}}, \sigma_{\text{lpsi}})$$

145 
$$\text{ltheta}_k \sim N(\mu_{\text{ltheta}}, \sigma_{\text{ltheta}})$$

146 
$$\text{lp}_k \sim N(\mu_{\text{lp}}, \sigma_{\text{lp}})$$

147 
$$\beta 1_k \sim N(\mu_{\beta 1}, \sigma_{\beta 1})$$

148 
$$\beta 2_k \sim N(\mu_{\beta 2}, \sigma_{\beta 2})$$

149 
$$\beta 3_k \sim N(\mu_{\beta 3}, \sigma_{\beta 3})$$

150 Community-level parameters are described by weakly informative hyperpriors [28]. All  
151 mean values for the above prior distributions were selected from a normal distribution and all  
152 standard deviations were selected from a uniform distribution.

153 
$$\mu \sim N(0, 10)$$

154 
$$\sigma \sim \text{Uniform}(0, 5)$$

155 Prior sensitivity was assessed by running the model with various prior parameterizations.

156 Posterior distributions were similar across all priors.

## 157 **Model Assessment and Comparison**

158 To assess model fit, we looked at diagnostic plots to examine model fit and highlight  
159 areas of lack of fit. We plotted the deviance residuals for each species and site, and plotted  
160 deviance residuals against covariates. We calculated Bayesian  $p$ -values following [29], adapted

161 for a multi-scale model (Supporting Information 2) to assess goodness-of-fit, where values close  
162 to 0.5 indicate a good fit and values  $>0.95$  or  $<0.05$  indicate a poor fit.

163 We also adapted model selection and cross-validation calculations from [29] for multi-  
164 scale, multi-species occupancy models to determine the best model. We calculated the  
165 Watanabe-Akaike information criterion (WAIC; [30]) and the conditional predictive ordinate  
166 criterion (CPO; [31]), and then evaluated the results of  $k$ -fold cross validation using the Brier  
167 score and the logarithmic score. The complete calculations for all model assessment and  
168 comparison methods can be found in Supporting Information 2.

### 169 **Unknown Species Richness**

170 In addition to the model described above, we implemented a model using data  
171 augmentation for communities with unknown species richness [10]. This model can be used to  
172 estimate species richness for the sampling area through the inclusion of another Bernoulli  
173 variable:

$$174 \quad w_k \sim \text{Bernoulli}(\Omega)$$

$$175 \quad \Omega \sim \text{Uniform}(0,1)$$

176 For species  $k$  ( $k = 1, 2, \dots, M$ ),  $M$  is the total number of species in the augmented model and  $w_k = 1$   
177 if species  $k$  was ever detected during the study. An upper limit to species richness ( $M$ ) is  
178 specified a priori and considered large enough when the estimate of true species richness is  
179 sufficiently lower than  $M$  (i.e., the value of  $M$  is in the right tail of the posterior distribution of  
180 species richness; [28]).

### 181 Case Study: Conception Bay, Newfoundland



## 182 Sample Collection, Processing and Sequencing

183 Triplicate 250 mL water samples were collected from coastal surface water at eight sites

| Marker            | Target Length (bp) | Forward Primer                                  | Reverse Primer                                      | Reference |
|-------------------|--------------------|-------------------------------------------------|-----------------------------------------------------|-----------|
| Fishe (Mini_SH-E) | 226                | 5'-CACGACGTTGTAACGACAC YAAICAYAAAGAYATIGGCAC-3' | 5'-GGATAACAATTTACACAGGCTT ATRTRTTTATICGIGGRAAIGC-3' | [61]      |
| Fishc (Mini_SH-C) | 127                | 5'-CACGACGTTGTAACGACAC YAAICAYAAAGAYATIGGCAC-3' | 5'-GGATAACAATTTACACAGGGAA RATCATAATGAAGGCATGIGC-3'  | [61]      |

184 along two transects in Conception Bay, Newfoundland and Labrador, Canada, on October 13–14,  
185 2017. Water samples were filtered using 0.22 µm PVDF Sterivex filters (MilliporeSigma) and  
186 DNA was extracted from filter membranes using the DNeasy PowerWater Kit (Qiagen). Five  
187 target markers in the cytochrome *c* oxidase I (COI) region were amplified by PCR from each  
188 sample. Table 1 details the primer sets used to target these markers. Three PCR replicates were  
189 performed for each amplicon from each sample and then pooled for a single PCR cleanup with  
190 the QIAquick 96 PCR purification kit (Qiagen). Amplicons were then indexed using unique dual  
191 Nextera indexes (IDT). All amplicons were pooled into one library to normalize DNA  
192 concentration and the library was sequenced with a 300-cycle S4 kit on the NovaSeq 6000  
193 following the NovaSeq XP workflow. Raw sequence reads are available in NCBI's sequence  
194 read archive under accession number PRJNA574050. Primers were trimmed from sequences  
195 and then DADA2 v1.8.015 [32] was used for quality filtering, joining paired end reads and  
196 denoising to produce exact sequence variants (ESVs). Taxonomy was assigned using NCBI's  
197 blastn tool v2.6.026 [33] to compare ESV sequences against the nt database. See [5] for detailed  
198 sampling, sequencing, and bioinformatic methodology.

199 **Table 1** - Primer pairs used to amplify five target amplicons in the COI region of the  
200 mitochondrial genome from water samples collected in Conception Bay, Newfoundland, Canada.

|       |     |                                   |                                    |      |
|-------|-----|-----------------------------------|------------------------------------|------|
| F230  | 235 | 5'-GGTCAACAAATCATAAAGATAT TGG-3'  | 5'-CTTATRTRTRTTTATNCGNGGRAA NGC-3' | [62] |
| Leray | 330 | 5'-GGWACWGGWTGAACWGTWT AYCCYCC-3' | 5'-TAAACTTCAGGGTGACCAAAAAA TCA-3'  | [63] |
| BR5   | 310 | 5'-CCIGAYATRGCIITYCCICG-3'        | 5'-GTRATIGCICCIACIARIACIGG-3'      | [64] |

201

202

### 203 **Occupancy Model Implementation**

204 Under the occupancy modelling framework described above, each collection site along  
205 each transect in Conception Bay was considered a different site in the occupancy model.

206 Replicate bottles collected at a site were considered samples. Each amplicon sequenced from  
207 each bottle was considered a technical replicate. While we conducted replicate PCRs of each  
208 amplicon, the products were pooled prior to sequencing so we did not include PCR replicates  
209 separately in our models. However, PCR replicates can easily be accommodated in multi-scale,  
210 multi-species occupancy models, such as the model described here.

211 We included sequencing depth (number of reads per sample per amplicon) as a  
212 continuous covariate at the level of probability of detection. Additionally, we included amplicon  
213 identity as a categorical covariate at the level of probability of detection. We included water  
214 depth (m) as a continuous covariate at the level of occupancy. We compared a null model with  
215 no covariates with four models with different combinations of covariates (Table 2).

216 All statistical analyses were conducted in R v3.5.1 [34]. MCMC sampling was achieved  
217 with JAGS [35], implemented using '*jagsUI*' v1.5.0 [36]. The model was written for JAGS in  
218 the BUGS language (see Supporting Information 3 for BUGS model structure of the most  
219 complex model). We fit models using known species richness to conduct our model

220 comparisons, and assessed models and model fit to determine the best model. MCMC sampling  
221 was run in three chains, each with 50,000 iterations, a burn in of 10,000, and a thinning rate of  
222 10. Convergence was verified using the Gelman-Rubin diagnostic [37] and by evaluating trace  
223 plots. For all models, we report parameter estimates as the mean of the posterior distribution with  
224 the 95% highest posterior density interval (HDI; [38]) calculated using ‘HDInterval’ v0.2.0 [39].  
225 Significance of continuous covariates was assessed by determining if the 95% confidence  
226 intervals of parameter estimates overlapped with zero [28]. For the categorical covariate  
227 amplicon, we used a generalized linear model with a beta distribution implemented using  
228 ‘betareg’ [40] to compare the estimated species-specific probabilities of detection between  
229 markers and phyla. Likelihood ratio tests were used to determine the significance of predictors at  
230  $\alpha = 0.05$ . We conducted a data augmented model with unknown species richness for the best  
231 model at varying levels of augmentation to determine the minimal level of augmentation  
232 required, as described above in the *Unknown Species Richness* section.

## 233 **Results**

234 We ran five multi-species, multi-scale occupancy models with different combinations of  
235 covariates (i.e., water depth at the level of occupancy, sequencing depth and amplicon at the  
236 level of detection probability) and assessed these models using model comparison and cross-  
237 validation methods adapted for this multi-scale approach (Table 2). Three of the model  
238 comparison methods (CPO and two cross-validation scores) were in agreement that Model 5  
239 ( $\psi(\text{water depth}) \theta(.) p(.)$ ) was the best model, while the WAIC suggested Model 3 ( $\psi(.) \theta(.)$   
240  $p(\text{sequencing depth})$ ) was the best model. We considered Model 5 our best model moving  
241 forward, given that most selection methods indicated this was the best model.

242 **Table 2** – Model comparison between multi-scale, multi-species occupancy models using four  
 243 methods (WAIC, CPO, Brier Score and Log Score). The covariates (water depth at the sampling  
 244 site, sequencing depth for each technical replicate, and amplicon sequenced for each technical  
 245 replicate) included at each level of the model (occupancy:  $\psi$ , capture:  $\Theta$ , detection:  $p$ ) are listed  
 246 on the left. Bolded values indicate the best model for each method of model comparison.

| MODELS                                                                                      | WAIC         | CPO            | Brier Score | Log Score   |
|---------------------------------------------------------------------------------------------|--------------|----------------|-------------|-------------|
| <b>Model 1</b><br>$\psi(.) \Theta(.) p(.)$                                                  | 16633        | 2904627        | 293         | 2291        |
| <b>Model 2</b><br>$\psi(\text{water depth}) \Theta(.) p(\text{sequencing depth, amplicon})$ | 62255        | 8069266        | 334         | 3715        |
| <b>Model 3</b><br>$\psi(.) \Theta(.) p(\text{sequencing depth})$                            | <b>16184</b> | 2395664        | 291         | 2279        |
| <b>Model 4</b><br>$\psi(.) \Theta(.) p(\text{amplicon})$                                    | 61864        | 9310577        | 333         | 3842        |
| <b>Model 5</b><br>$\psi(\text{water depth}) \Theta(.) p(.)$                                 | 16348        | <b>2027311</b> | <b>283</b>  | <b>2188</b> |

247

248 We assessed model fit using Bayesian  $p$ -values and diagnostic plots for all models but  
 249 present the results for the best model only. We obtained a Bayesian  $p$ -value of 0.51, suggesting  
 250 that Model 5 ( $\psi(\text{water depth}) \Theta(.) p(.)$ ) provided a good fit to our data overall; diagnostic plots,  
 251 however, revealed higher deviance at sites with lower water depth, suggesting a poorer model fit  
 252 at shallower sites (Supporting Information 4). The community-wide estimate for occupancy was  
 253 0.27 (HDI: 0.22-0.33). Water depth had a significant effect on the community mean occupancy  
 254 (Figure 2), and we detected considerably more species at the shallowest sites compared to the  
 255 other sites (274 species at two shallow water sites combined compared to 109 species across all  
 256 six deep water sites). The community-wide probability of capture was 0.98 (HDI: 0.96-0.99) and  
 257 the community-wide probability of detection was 0.15 (HDI: 0.14-0.17). Species-specific  
 258 estimates of occupancy, capture probability, and detection probability were also obtained from  
 259 the model (Supporting Information 5).

260 **Figure 2** - (A) Community mean occupancy by water depth (m) predicted using a multi-species,  
 261 multi-scale community occupancy model. The gray area represents the 95% confidence interval.

262 (B) Parameter estimate for each species for the effect of water depth on occupancy in a multi-  
263 species, multi-scale community occupancy model. Solid red line indicates the community mean  
264 and dashed red lines indicate the upper and lower limits of the 95% confidence intervals of the  
265 community mean parameter estimate. Blue lines indicate 95% confidence intervals of individual  
266 species parameter estimates that do not overlap with 0. Grey lines indicate 95% confidence  
267 intervals of individual species parameter estimates that do overlap with 0.

268

269 While it was not selected as our best model, we present the results from Model 4 ( $\psi(\cdot)$   
270  $\Theta(\cdot) p(\text{amplicon})$ ) to demonstrate how categorical covariates can be incorporated into the  
271 occupancy modelling framework. Amplicons displayed significantly different probabilities of  
272 detection ( $X^2 = 34.43$ , p-value  $< 0.001$ ; Figure 3). When considering species-specific  
273 probabilities of detection and including phylum-level identifications, there was a significant  
274 interaction between amplicon and phylum ( $X^2 = 85.18$ , p-value  $< 0.001$ ), and some amplicons  
275 clearly failed to detect certain taxonomic groups (Figure 4).

276 **Figure 3** - Mean detection probability estimated from occupancy model 3 ( $\psi(\cdot) \Theta(\cdot)$   
277  $p(\text{amplicon})$ ) for each species plotted by amplicon. The band in the middle of the box represents  
278 the median and the upper and lower edges of the box represent the upper and lower quartiles.  
279 The whiskers represent 1.5 times the inter-quartile range. Beta regression indicated a significant  
280 effect of amplicon on probability of detection ( $X^2 = 34.43$ , p-value  $< 0.001$ ). Significant different  
281 ( $\alpha = 0.05$ ) between amplicon are denoted by different letters above each amplicon.

282 **Figure 4** - Mean detection probability for each species plotted by amplicon and phylum for  
283 metazoan phyla only. The band in the middle of the box represents the median and the upper and  
284 lower edges of the box represent the upper and lower quartiles. The whiskers represent 1.5 times  
285 the inter-quartile range.

286

287 Sequencing depth was not included as a covariate in the best model; in the best model  
288 that did include sequencing depth, Model 3 ( $\psi(\cdot) \Theta(\cdot) p(\text{sequencing depth})$ ), we observed no  
289 significant effect of sequencing depth in this case study (Supporting Information 6).

290 We estimated species richness for the survey area by running the best model with data  
291 augmentation. This model used the probabilities of capture and detection to estimate the number

292 of species missed in sampling efforts. We detected 231 species overall, and the estimated species  
293 richness for the survey area was 284 (HDI: 262-307), indicating that 53 (HDI: 31-76) species  
294 were undetected during our surveys. In other words, our survey detected ~81% of the estimated  
295 species in our study area.

## 296 **Discussion**

297 We applied a multi-species, multi-scale occupancy model to a DNA metabarcoding  
298 dataset generated from marine water samples and explored how the inclusion of categorical and  
299 continuous covariates at different levels improved model performance. The best model included  
300 water depth as a covariate at the level of occupancy, where we observed a higher species  
301 richness at shallower sites. One of the shallow water collection sites was within 1 km of a  
302 sewage outflow, which may have contributed to this result, although a high species richness was  
303 also observed at the second, shallow water site located >10 km from the sewage outflow. The  
304 probability of capture estimate of 0.98 suggests a high probability of collecting a species' DNA  
305 in a given sample. However, the detection probability was relatively low at 0.15, likely because  
306 many species were not detected consistently by multiple amplicons, and a low probability of  
307 detection can lead to overestimates for higher level parameters [41].

308 We observed a significant effect of amplicon and phylum on the species-specific  
309 probabilities of detection. Since the performance of each amplicon varies by taxonomic group  
310 (this study; [13]), including a variety of target regions is important to detect species across the  
311 tree of life, and increasing the number of technical replicates using a target region will not  
312 necessarily improve the community-wide probability of detection. We observed no significant  
313 effect of sequencing depth in this study. However, the samples were all sequenced on a NovaSeq

314 instrument, which generates an unprecedented number of reads, yielding very high sequencing  
315 depths (mean number of filtered sequences per sample  $\pm$  standard deviation: 8,519,055  $\pm$   
316 2,514,998) compared to many other barcoding studies (e.g. [42,43]). In studies where the mean  
317 sequencing depth is lower, differences in sequencing depth are likely to have greater effects  
318 [5,44].

319 We used the occupancy modeling framework to estimate the species richness for the  
320 survey area and determined that 53 species or approximately 19% of the estimated number of  
321 species present were undetected during our surveys. Similar to many ecological studies, the case  
322 study presented here included a relatively low spatial coverage ( $n = 8$  sites), but our occupancy  
323 modelling approach allowed us to assess false absences in our study, which is a significant  
324 improvement from most metabarcoding surveys [11]. The proportion of species detected could  
325 be improved by (1) increasing sampling effort in the field by sampling more sites, (2) collecting  
326 more replicate biological samples at each site, and (3) including additional target regions during  
327 laboratory processing. Given the limited extent and breadth of our sampling effort, the  
328 conclusions regarding the effect of covariates and the estimates of occupancy, capture, and  
329 detection probabilities for individual species should not be extrapolated to other systems. Further  
330 research should investigate the impacts of variation in sequencing depth and target regions on  
331 detection probability in metabarcoding studies, particularly in other ecosystems and across  
332 greater spatial scales.

333 Through the inclusion of environmental and experimental covariates, the multi-species  
334 occupancy framework can be applied for direct ecological assessment and to improve the  
335 methodology for next-generation biodiversity assessment. From an ecological perspective,  
336 environmental variables (e.g. temperature, salinity, turbidity) can be included at the level of

337 occupancy to determine their effects on community diversity and the presence of individual  
338 species. From a methodological perspective, environmental and experimental variables (e.g.  
339 sample volume, sequencing depth) can be included at the level of field sampling and technical  
340 replication to understand how these factors affect metabarcoding results. Understanding the  
341 effects of these covariates facilitates the development of more robust experimental and survey  
342 designs. Furthermore, simulations using occupancy models can be used to optimize sampling  
343 effort, enabling practitioners to fine-tune the trade-off between field sampling and lab work [21].  
344 The number of sites, biological samples, and technical replicates can all be optimized to  
345 maximize the species richness recovered from eDNA samples. PCR level stochasticity, which is  
346 known to affect sequencing results [44,45], was not considered in our case study (i.e., PCR  
347 replicates were pooled before sequencing) but PCR replicates can easily be included as technical  
348 replicates in the model described here. PCR replicates are commonly included separately in  
349 single-species occupancy models for eDNA data [19,20,27]. By including PCR replicates as  
350 technical replicates, additional stochasticity in the sampling process can be accounted for, further  
351 improving inferences.

352         A key advantage of the occupancy modeling framework demonstrated here is its  
353 flexibility. Modifications to the model can allow several additional factors to be included, and a  
354 priori information can be used to guide model development. For example, multiple sampling  
355 periods have been included in dynamic, multi-season occupancy models to quantify temporal  
356 changes in community structure (e.g. [22]). Repeated eDNA sampling for metabarcoding could  
357 be modelled similarly to account for local extinction and colonization events between sampling  
358 periods. In addition to accounting for false negatives, several studies have developed methods for  
359 including false positives in occupancy models [46–48]. False positives may potentially arise



360 from metabarcoding data through sequencing errors, PCR errors, and poor reference database  
361 coverage or quality [15,49,50]. Strict bioinformatic filtering helps to minimize the inclusion of  
362 these errors in resulting data sets; however, the possibility of false positives cannot be  
363 eliminated. Our model did not consider false positives, and, to our knowledge, these have yet to  
364 be incorporated into multi-species occupancy models. The occupancy modeling framework can  
365 also be adapted to include or estimate taxa abundances [28]. Following current protocols,  
366 abundance estimates from metabarcoding data are not reliable [51,52], but these models may  
367 provide tools to improve abundance estimates from metabarcoding data.

368         We demonstrate for the first time how a multi-scale, multi-species occupancy modelling  
369 framework can be used in a natural system to account for imperfect detection and allow for  
370 critical assessment of experimental and environmental factors influencing biodiversity data from  
371 eDNA metabarcoding. Despite the utility of these models for improving detection and targeting  
372 areas of variation in the pipeline from sample collection to sample processing, this approach has  
373 been underutilized in DNA metabarcoding studies (Supplementary Information 1; but see [25]).  
374 This multi-species occupancy modelling framework will be particularly useful for bioassessment  
375 studies using DNA metabarcoding because it will improve estimates of occupancy and species  
376 richness, aid in optimizing sampling efforts in the field and lab, and, using the model assessment  
377 methods described here, identify ecological and environmental factors affecting occupancy,  
378 capture, and detection probabilities. Given the high stakes for documenting and understanding  
379 biodiversity that is under increasing anthropogenic threat [53] and decline [54] globally, new  
380 tools are imperative for rapid bioassessment [7,55,56]; yet, like any emergent technology, there  
381 is the potential to misuse these tools [57], which can have unforeseen consequences (e.g. [58]).  
382 In the case of DNA metabarcoding, neglecting to assess imperfect detection at key points along

383 the sample collection and processing pipeline could lead to failure to detect species of interest,  
384 biased estimates of species richness, and miscalculations of species distributions, all of which  
385 have consequences for conservation and management [24,59,60]. We recommend incorporating  
386 multi-scale, multi-species occupancy modeling into the design and analysis of future  
387 metabarcoding studies.

388

389

390

### 391 **Acknowledgements**

392 We would like to thank Nicole Fahner, Joshua Barnes, Avery McCarthy, Greg Singer,  
393 Hoda Rajabi, and Emily Porter for their assistance in sample collection, processing and  
394 bioinformatics.

395 **References**

- 396 1. Deiner K, Bik HM, Mächler E, Seymour M, Lacoursière-Roussel A, Altermatt F, et al.  
397 Environmental DNA metabarcoding: Transforming how we survey animal and plant  
398 communities. *Mol Ecol.* 2017;26: 5872–5895. doi:10.1111/mec.14350
- 399 2. Thomsen PF, Willerslev E. Environmental DNA – An emerging tool in conservation for  
400 monitoring past and present biodiversity. *Biol Conserv.* 2015;183: 4–18.  
401 doi:10.1016/j.biocon.2014.11.019
- 402 3. Bohmann K, Evans A, Gilbert MTP, Carvalho GR, Creer S, Knapp M, et al. Environmental  
403 DNA for wildlife biology and biodiversity monitoring. *Trends Ecol Evol.* 2014;29: 358–  
404 367. doi:10.1016/j.tree.2014.04.003
- 405 4. Jeunen G, Knapp M, Spencer HG, Lamare MD, Taylor HR, Stat M, et al. Environmental  
406 DNA (eDNA) metabarcoding reveals strong discrimination among diverse marine habitats  
407 connected by water movement. *Mol Ecol Resour.* 2019;19: 426–438. doi:10.1111/1755-  
408 0998.12982
- 409 5. Singer GAC, Fahner NA, Barnes JG, McCarthy A, Hajibabaei M. Comprehensive  
410 biodiversity analysis via ultra-deep patterned flow cell technology: a case study of eDNA  
411 metabarcoding seawater. *Sci Rep.* 2019;9: 5991. doi:10.1038/s41598-019-42455-9
- 412 6. Stat M, Huggett MJ, Bernasconi R, DiBattista JD, Berry TE, Newman SJ, et al. Ecosystem  
413 biomonitoring with eDNA: metabarcoding across the tree of life in a tropical marine  
414 environment. *Sci Rep.* 2017;7: 12240. doi:10.1038/s41598-017-12501-5
- 415 7. Baird DJ, Hajibabaei M. Biomonitoring 2.0: a new paradigm in ecosystem assessment  
416 made possible by next-generation DNA sequencing. *Mol Ecol.* 2012;21: 2039–2044.  
417 doi:10.1111/j.1365-294X.2012.05519.x
- 418 8. Valentini A, Taberlet P, Miaud C, Civade R, Herder J, Thomsen PF, et al. Next-generation  
419 monitoring of aquatic biodiversity using environmental DNA metabarcoding. *Mol Ecol.*  
420 2016;25: 929–942. doi:10.1111/mec.13428
- 421 9. Kéry M, Schmidt B. Imperfect detection and its consequences for monitoring for  
422 conservation. *Community Ecol.* 2008;9: 207–216. doi:10.1556/ComEc.9.2008.2.10
- 423 10. Dorazio RM, Royle JA, Söderström B, Glimskär A. Estimating species richness and  
424 accumulation by modeling species occurrence and detectability. *Ecology.* 2006;87: 842–854.  
425 doi:10.1890/0012-9658(2006)87[842:ESRAAB]2.0.CO;2
- 426 11. Guillera-Aroita G, Lahoz-Monfort JJ, MacKenzie DI, Wintle BA, McCarthy MA. Ignoring  
427 imperfect detection in biological surveys is dangerous: A response to ‘Fitting and  
428 interpreting occupancy models’’. White EP, editor. *PLoS ONE.* 2014;9: e99571.  
429 doi:10.1371/journal.pone.0099571

- 430 12. Evans NT, Shirey PD, Wieringa JG, Mahon AR, Lamberti GA. Comparative cost and effort  
431 of fish distribution detection via environmental DNA analysis and electrofishing. *Fisheries*.  
432 2017;42: 90–99. doi:10.1080/03632415.2017.1276329
- 433 13. Freeland J. The importance of molecular markers and primer design when characterizing  
434 biodiversity from environmental DNA (eDNA). *Genome*. 2017;60: 358–374.  
435 doi:10.1139/gen-2016-0100
- 436 14. Smith DP, Peay KG. Sequence depth, not PCR replication, improves ecological inference  
437 from next generation DNA sequencing. Kellogg CA, editor. *PLoS ONE*. 2014;9: e90234.  
438 doi:10.1371/journal.pone.0090234
- 439 15. Ficetola GF, Pansu J, Bonin A, Coissac E, Giguet-Covex C, De Barba M, et al. Replication  
440 levels, false presences and the estimation of the presence/absence from eDNA  
441 metabarcoding data. *Mol Ecol Resour*. 2015;15: 543–556. doi:10.1111/1755-0998.12338
- 442 16. Campos-Cerqueira M, Aide TM. Improving distribution data of threatened species by  
443 combining acoustic monitoring and occupancy modelling. Jones K, editor. *Methods Ecol*  
444 *Evol*. 2016;7: 1340–1348. doi:10.1111/2041-210X.12599
- 445 17. Ramesh T, Downs CT. Impact of land use on occupancy and abundance of terrestrial  
446 mammals in the Drakensberg Midlands, South Africa. *J Nat Conserv*. 2015;23: 9–18.  
447 doi:10.1016/j.jnc.2014.12.001
- 448 18. Steenweg R, Whittington J, Hebblewhite M, Forshner A, Johnston B, Petersen D, et al.  
449 Camera-based occupancy monitoring at large scales: Power to detect trends in grizzly bears  
450 across the Canadian Rockies. *Biol Conserv*. 2016;201: 192–200.  
451 doi:10.1016/j.biocon.2016.06.020
- 452 19. Hunter ME, Oyler-McCance SJ, Dorazio RM, Fike JA, Smith BJ, Hunter CT, et al.  
453 Environmental DNA (eDNA) sampling improves occurrence and detection estimates of  
454 invasive Burmese pythons. Mahon AR, editor. *PLoS ONE*. 2015;10: e0121655.  
455 doi:10.1371/journal.pone.0121655
- 456 20. Schmidt BR, Kéry M, Ursenbacher S, Hyman OJ, Collins JP. Site occupancy models in the  
457 analysis of environmental DNA presence/absence surveys: a case study of an emerging  
458 amphibian pathogen. Yoccoz N, editor. *Methods Ecol Evol*. 2013;4: 646–653.  
459 doi:10.1111/2041-210X.12052
- 460 21. Erickson RA, Merkes CM, Mize EL. Sampling designs for landscape-level eDNA  
461 monitoring programs. *Integr Environ Assess Manag*. 2019; doi:10.1002/ieam.4155
- 462 22. Goijman AP, Conroy MichaelJ, Bernardos JN, Zaccagnini ME. Multi-season regional  
463 analysis of multi-species occupancy: Implications for bird conservation in agricultural lands  
464 in East-Central Argentina. Arlettaz R, editor. *PLoS ONE*. 2015;10: e0130874.  
465 doi:10.1371/journal.pone.0130874

- 466 23. Van der Weyde LK, Mbisana C, Klein R. Multi-species occupancy modelling of a  
467 carnivore guild in wildlife management areas in the Kalahari. *Biol Conserv.* 2018;220: 21–  
468 28. doi:10.1016/j.biocon.2018.01.033
- 469 24. Guillera-Aroita G. Modelling of species distributions, range dynamics and communities  
470 under imperfect detection: advances, challenges and opportunities. *Ecography.* 2017;40:  
471 281–295. doi:10.1111/ecog.02445
- 472 25. Doi H, Fukaya K, Oka S, Sato K, Kondoh M, Miya M. Evaluation of detection probabilities  
473 at the water-filtering and initial PCR steps in environmental DNA metabarcoding using a  
474 multispecies site occupancy model. *Sci Rep.* 2019;9: 1–8. doi:10.1038/s41598-019-40233-1
- 475 26. Lugg WH, Griffiths J, van Rooyen AR, Weeks AR, Tingley R. Optimal survey designs for  
476 environmental DNA sampling. Jarman S, editor. *Methods Ecol Evol.* 2018;9: 1049–1059.  
477 doi:10.1111/2041-210X.12951
- 478 27. Strickland GJ, Roberts JH. Utility of eDNA and occupancy models for monitoring an  
479 endangered fish across diverse riverine habitats. *Hydrobiologia.* 2019;826: 129–144.  
480 doi:10.1007/s10750-018-3723-8
- 481 28. Kéry M, Royle JA. *Applied Hierarchical Modeling in Ecology.* London: Academic press;  
482 2016.
- 483 29. Broms KM, Hooten MB, Fitzpatrick RM. Model selection and assessment for multi-species  
484 occupancy models. *Ecology.* 2016;97: 1759–1770. doi:10.1890/15-1471.1
- 485 30. Watanabe S. Asymptotic Equivalence of Bayes Cross Validation and Widely Applicable  
486 Information Criterion in Singular Learning Theory. *J Mach Learn Res.* 2010;11: 3571–  
487 3594.
- 488 31. Pettit LI. The conditional predictive ordinate for the normal distribution. *J R Stat Soc Ser B*  
489 *Stat Methodol.* 1990;52: 175–184. doi:10.1111/j.2517-6161.1990.tb01780.x
- 490 32. Callahan BJ, McMurdie PJ, Rosen MJ, Han AW, Johnson AJA, Holmes SP. DADA2:  
491 High-resolution sample inference from Illumina amplicon data. *Nat Methods.* 2016;13:  
492 581–583. doi:10.1038/nmeth.3869
- 493 33. Altschul SF, Gish W, Miller W, Myers EW, Lipman DJ. Basic local alignment search tool.  
494 *J Mol Biol.* 1990;215: 403–410. doi:10.1016/S0022-2836(05)80360-2
- 495 34. R Core Team. *R: A language and environment for statistical computing.* R Found Stat  
496 Comput Vienna Austria. 2018; Available: <https://www.R-project.org/>
- 497 35. Plummer M. JAGS: A program for analysis of Bayesian graphical models using Gibbs  
498 sampling. *Proc 3rd Int Workshop Distributed Stat Comput.* 2003; Available: [http://](http://www.ci.tuwien.ac.at/Conferences/DSC-2003/)  
499 [www.ci.tuwien.ac.at/Conferences/DSC-2003/](http://www.ci.tuwien.ac.at/Conferences/DSC-2003/)

- 500 36. Kellner K. jagsUI: a wrapper around “rjags” to streamline “JAGS” analyses. 2018;R  
501 package version 1.5.0. Available: <https://CRAN.R-project.org/package=jagsUI>
- 502 37. Brooks SP, Gelman A. General methods for monitoring convergence of iterative  
503 simulations. *J Comput Graph Stat.* 1998;7: 434–455. doi:10.2307/1390675
- 504 38. Kruschke JK. *Doing Bayesian Data Analysis*. 2nd ed. London: Academic Press; 2015.
- 505 39. Meredith M, Kruschke J. HDInterval: Highest (Posterior) Density Intervals. R Package  
506 Version 020. 2018; Available: <https://CRAN.R-project.org/package=HDInterval>
- 507 40. Cribari-Neto F, Zeileis A. Beta regression in R. *J Stat Softw.* 2010;34: 1–24.  
508 doi:10.18637/jss.v034.i02
- 509 41. MacKenzie DI, Nichols JD, Lachman GB, Droege S, Royle JA, Langtimm CA. Estimating  
510 site occupancy rates when detection probabilities are less than one. *Ecology.* 2002;83:  
511 2248–2255. doi:10.1890/0012-9658(2002)083[2248:ESORWD]2.0.CO;2
- 512 42. Leray M, Knowlton N. Censusing marine eukaryotic diversity in the twenty-first century.  
513 *Philos Trans R Soc B Biol Sci.* 2016;371: 20150331. doi:10.1098/rstb.2015.0331
- 514 43. Sigsgaard EE, Nielsen IB, Carl H, Krag MA, Knudsen SW, Xing Y, et al. Seawater  
515 environmental DNA reflects seasonality of a coastal fish community. *Mar Biol.* 2017;164.  
516 doi:10.1007/s00227-017-3147-4
- 517 44. Alberdi A, Aizpurua O, Gilbert MTP, Bohmann K. Scrutinizing key steps for reliable  
518 metabarcoding of environmental samples. Mahon A, editor. *Methods Ecol Evol.* 2018;9:  
519 134–147. doi:10.1111/2041-210X.12849
- 520 45. Kechschull JM, Zador AM. Sources of PCR-induced distortions in high-throughput  
521 sequencing data sets. *Nucleic Acids Res.* 2015;43: e143. doi:10.1093/nar/gkv717
- 522 46. Royle JA, Link WA. Generalized site occupancy model allowing for false positive and false  
523 negative errors. *Ecology.* 2006;87: 835–841. doi:10.1890/0012-  
524 9658(2006)87[835:GSOMAF]2.0.CO;2
- 525 47. Lahoz-Monfort JJ, Guillera-Arroita G, Tingley R. Statistical approaches to account for  
526 false-positive errors in environmental DNA samples. *Mol Ecol Resour.* 2016;16: 673–685.  
527 doi:10.1111/1755-0998.12486
- 528 48. Guillera-Arroita G, Lahoz-Monfort JJ, van Rooyen AR, Weeks AR, Tingley R. Dealing  
529 with false-positive and false-negative errors about species occurrence at multiple levels.  
530 McCrea R, editor. *Methods Ecol Evol.* 2017;8: 1081–1091. doi:10.1111/2041-210X.12743
- 531 49. Ficetola GF, Taberlet P, Coissac E. How to limit false positives in environmental DNA and  
532 metabarcoding? *Mol Ecol Resour.* 2016;16: 604–607. doi:10.1111/1755-0998.12508

- 533 50. Porter TM, Hajibabaei M. Automated high throughput animal CO1 metabarcode  
534 classification. *Sci Rep.* 2018;8: 4226. doi:10.1038/s41598-018-22505-4
- 535 51. Fonseca VG. Pitfalls in relative abundance estimation using eDNA metabarcoding. *Mol*  
536 *Ecol Resour.* 2018;18: 923–926. doi:10.1111/1755-0998.12902
- 537 52. Lamb PD, Hunter E, Pinnegar JK, Creer S, Davies RG, Taylor MI. How quantitative is  
538 metabarcoding: A meta-analytical approach. *Mol Ecol.* 2019;28: 420–430.  
539 doi:10.1111/mec.14920
- 540 53. Steffen W, Broadgate W, Deutsch L, Gaffney O, Ludwig C. The trajectory of the  
541 Anthropocene: The great acceleration. *Anthr Rev.* 2015;2: 81–98.  
542 doi:10.1177/2053019614564785
- 543 54. IPBES. Global assessment report on biodiversity and ecosystem services of the  
544 Intergovernmental Science-Policy Platform on Biodiversity and Ecosystem Services. Bonn,  
545 Germany: IPBES Secretariat; 2019.
- 546 55. Ji Y, Ashton L, Pedley SM, Edwards DP, Tang Y, Nakamura A, et al. Reliable, verifiable  
547 and efficient monitoring of biodiversity via metabarcoding. Holyoak M, editor. *Ecol Lett.*  
548 2013;16: 1245–1257. doi:10.1111/ele.12162
- 549 56. Lacoursière-Roussel A, Howland K, Normandeau E, Grey EK, Archambault P, Deiner K, et  
550 al. eDNA metabarcoding as a new surveillance approach for coastal Arctic biodiversity.  
551 *Ecol Evol.* 2018;8: 7763–7777. doi:10.1002/ece3.4213
- 552 57. Cristescu ME, Hebert PDN. Uses and misuses of environmental DNA in biodiversity  
553 science and conservation. *Annu Rev Ecol Evol Syst.* 2018;49: 209–230.  
554 doi:10.1146/annurev-ecolsys-110617-062306
- 555 58. Garcia M. Racist in the machine: The disturbing implications of algorithmic bias. *World*  
556 *Policy J.* 2016;33: 111–117. doi:10.1215/07402775-3813015
- 557 59. Comte L, Grenouillet G. Species distribution modelling and imperfect detection: comparing  
558 occupancy versus consensus methods. Robertson M, editor. *Divers Distrib.* 2013;19: 996–  
559 1007. doi:10.1111/ddi.12078
- 560 60. DeWan AA, Zipkin EF. An integrated sampling and analysis approach for improved  
561 biodiversity monitoring. *Environ Manage.* 2010;45: 1223–1230. doi:10.1007/s00267-010-  
562 9457-7
- 563 61. Shokralla S, Hellberg RS, Handy SM, King I, Hajibabaei M. A DNA mini-barcoding  
564 system for authentication of processed fish products. *Sci Rep.* 2015;5.  
565 doi:10.1038/srep15894
- 566 62. Gibson JF, Shokralla S, Curry C, Baird DJ, Monk WA, King I, et al. Large-scale  
567 biomonitoring of remote and threatened ecosystems via high-throughput sequencing.  
568 Fontaneto D, editor. *PLoS ONE.* 2015;10: e0138432. doi:10.1371/journal.pone.0138432

- 569 63. Leray M, Yang JY, Meyer CP, Mills SC, Agudelo N, Ranwez V, et al. A new versatile  
570 primer set targeting a short fragment of the mitochondrial COI region for metabarcoding  
571 metazoan diversity: application for characterizing coral reef fish gut contents. *Front Zool.*  
572 2013;10: 34. doi:10.1186/1742-9994-10-34
- 573 64. Shokralla S, Porter TM, Gibson JF, Dobosz R, Janzen DH, Hallwachs W, et al. Massively  
574 parallel multiplex DNA sequencing for specimen identification using an Illumina MiSeq  
575 platform. *Sci Rep.* 2015;5. doi:10.1038/srep09687
- 576



Occupancy,  $\psi$

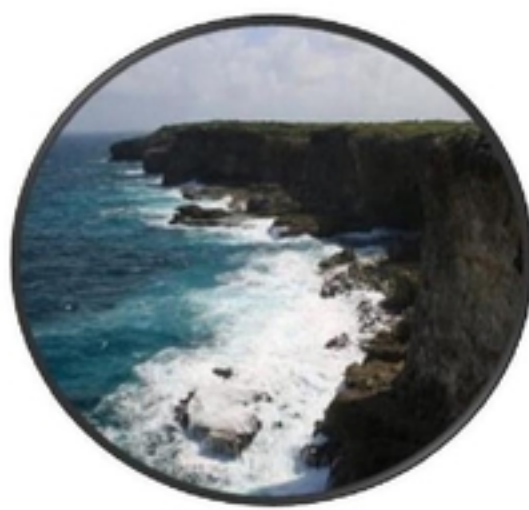

eDNA present at site,  $i$   
 $1, 2, \dots, I$

bioRxiv preprint doi: <https://doi.org/10.1101/797852>; this version posted October 8, 2019. The copyright holder for this preprint (which was not certified by peer review) is the author/funder, who has granted bioRxiv a license to display the preprint in perpetuity. It is made available under aCC-BY 4.0 International license.

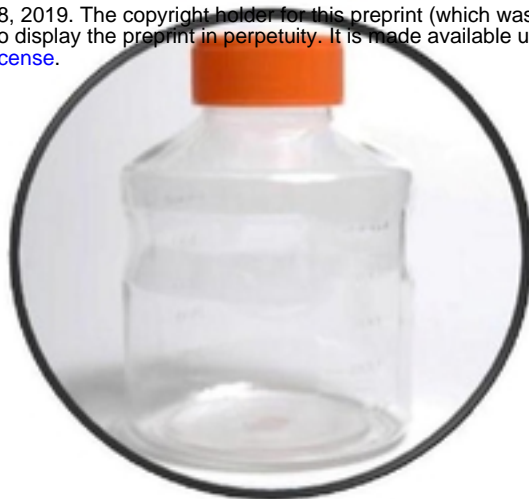

Capture,  $\theta$

eDNA present in sample,  $j$   
 $1, 2, \dots, J$

For species  $k$   
 $1, 2, \dots, K$

Detection,  $p$

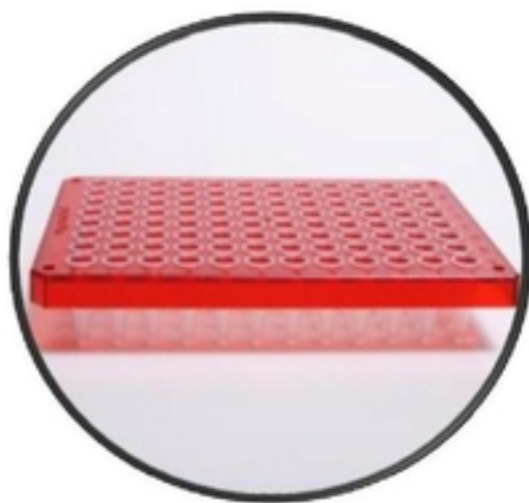

eDNA detected in replicate,  $r$   
 $1, 2, \dots, R$

Figure 1

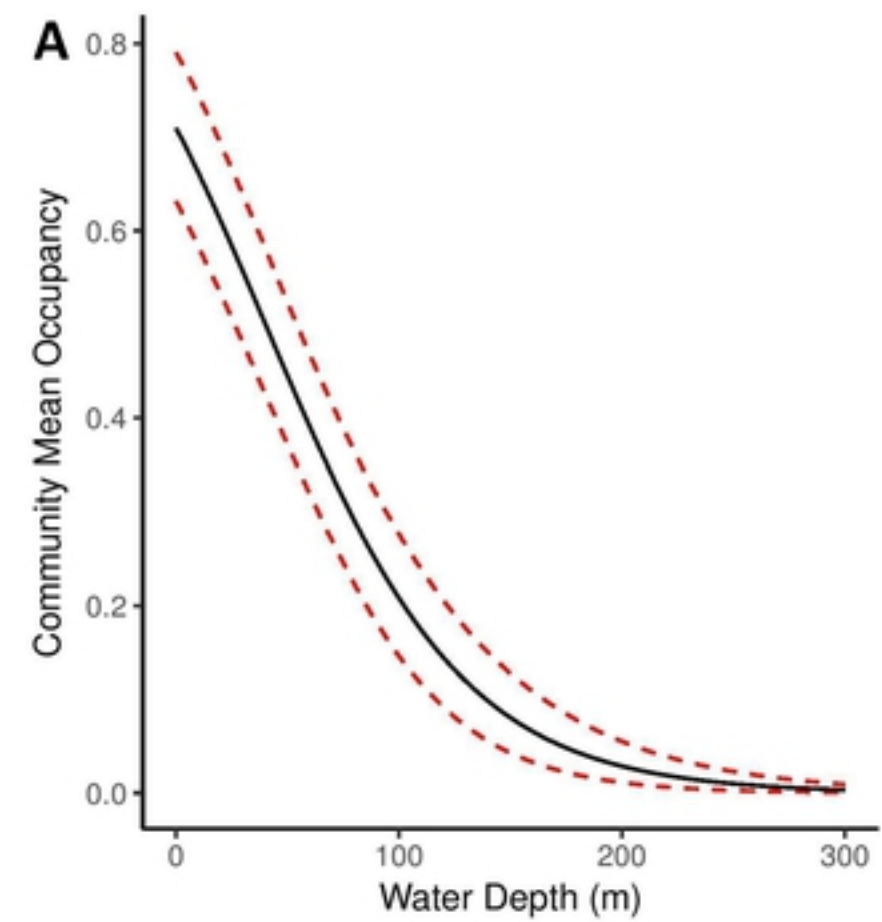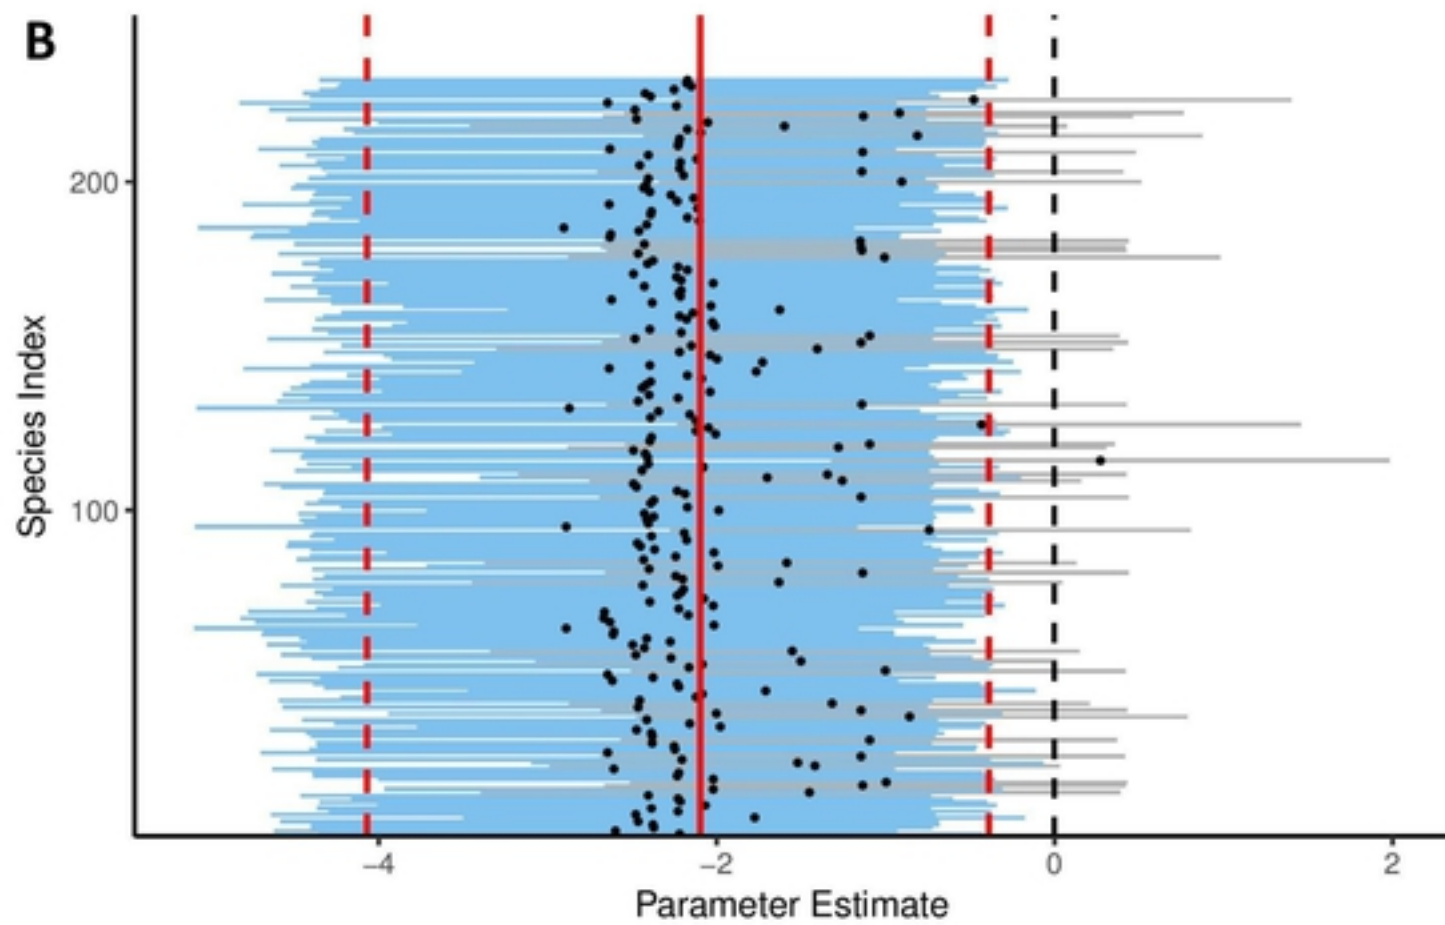

Figure 2

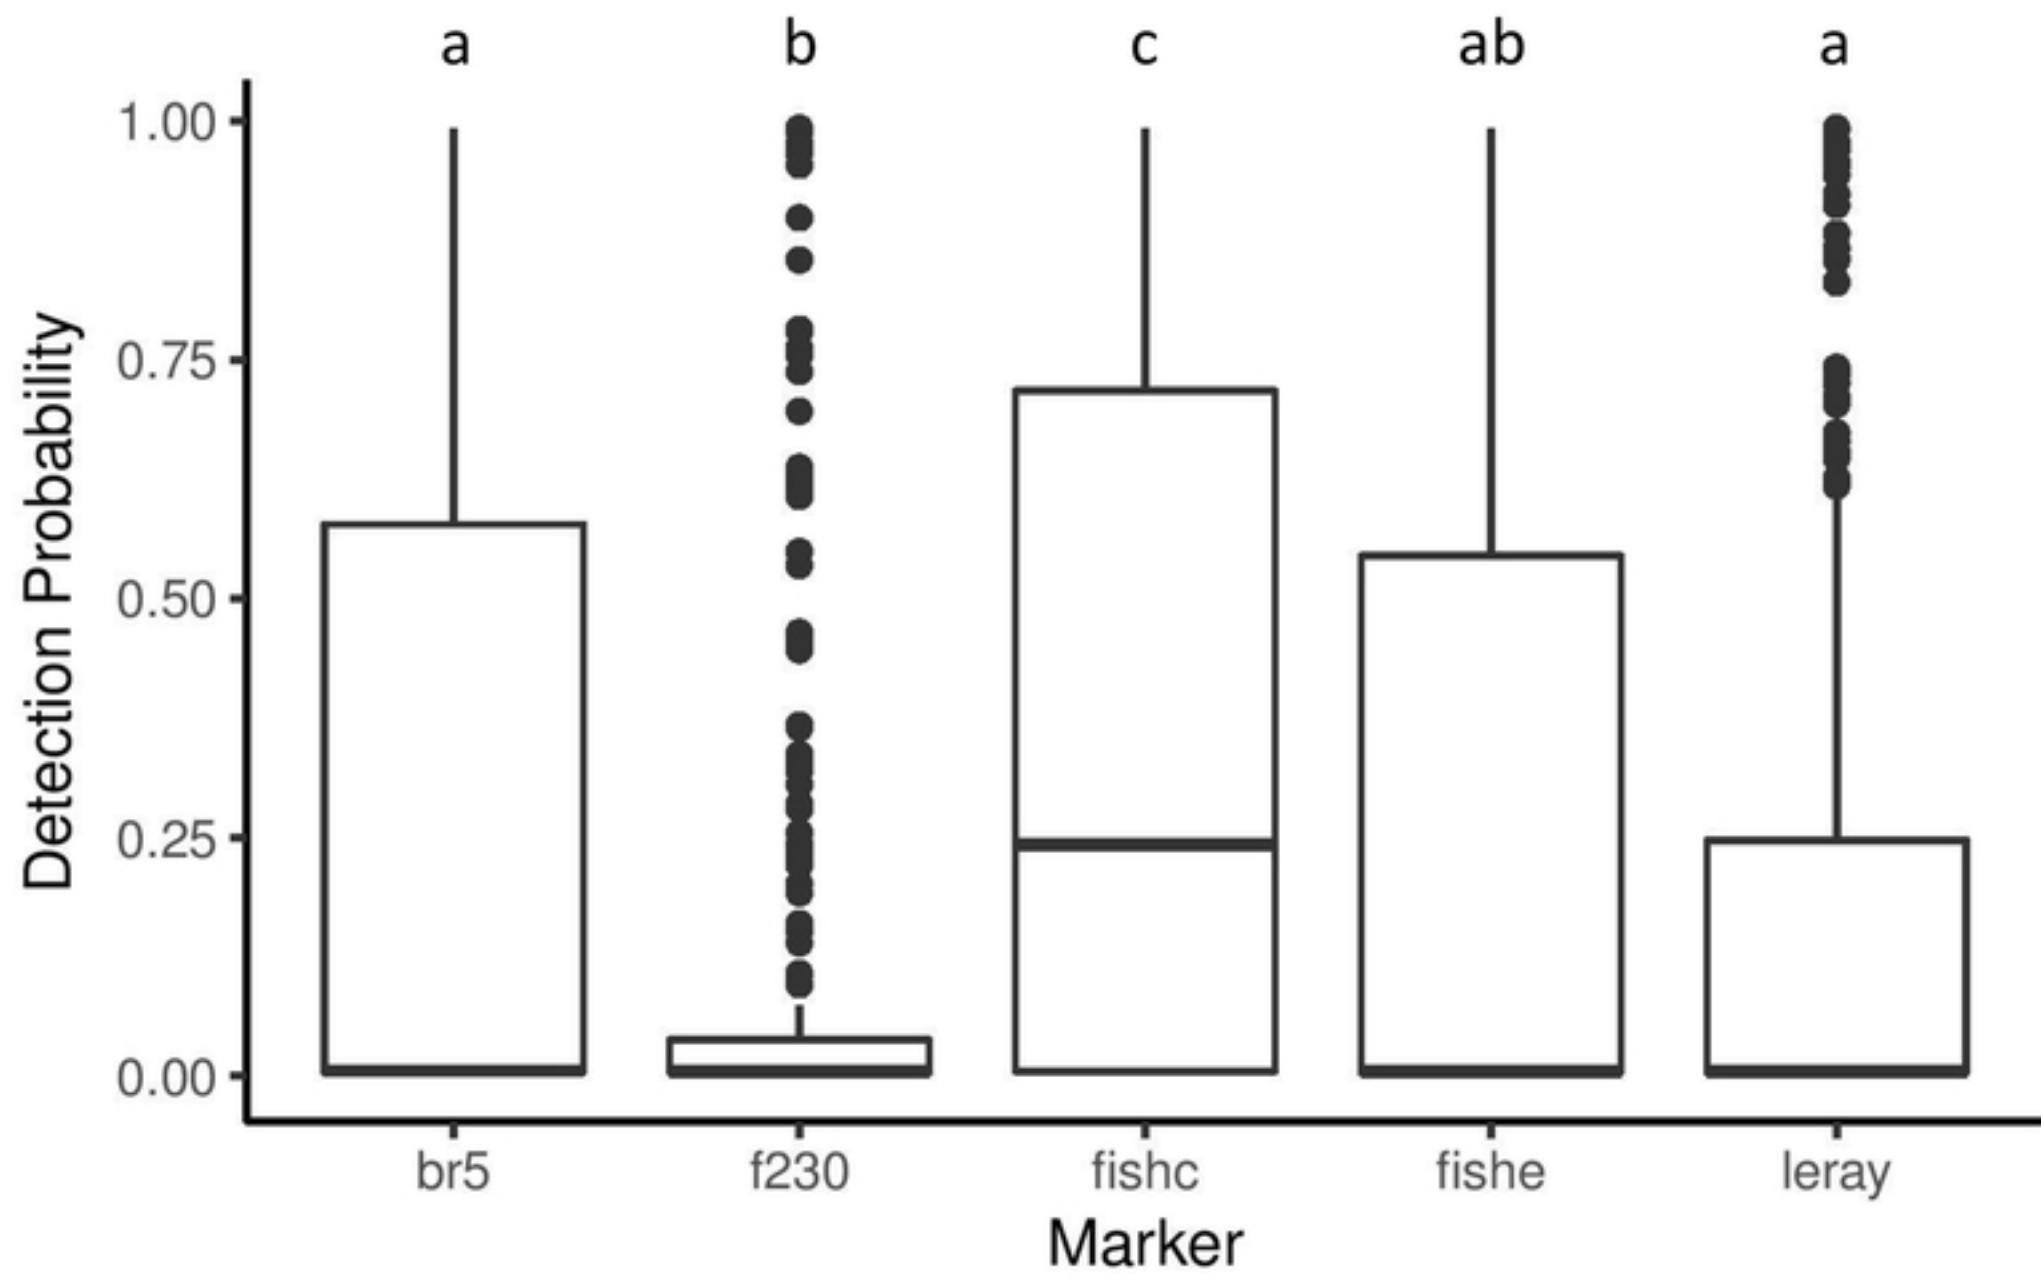

Figure 3

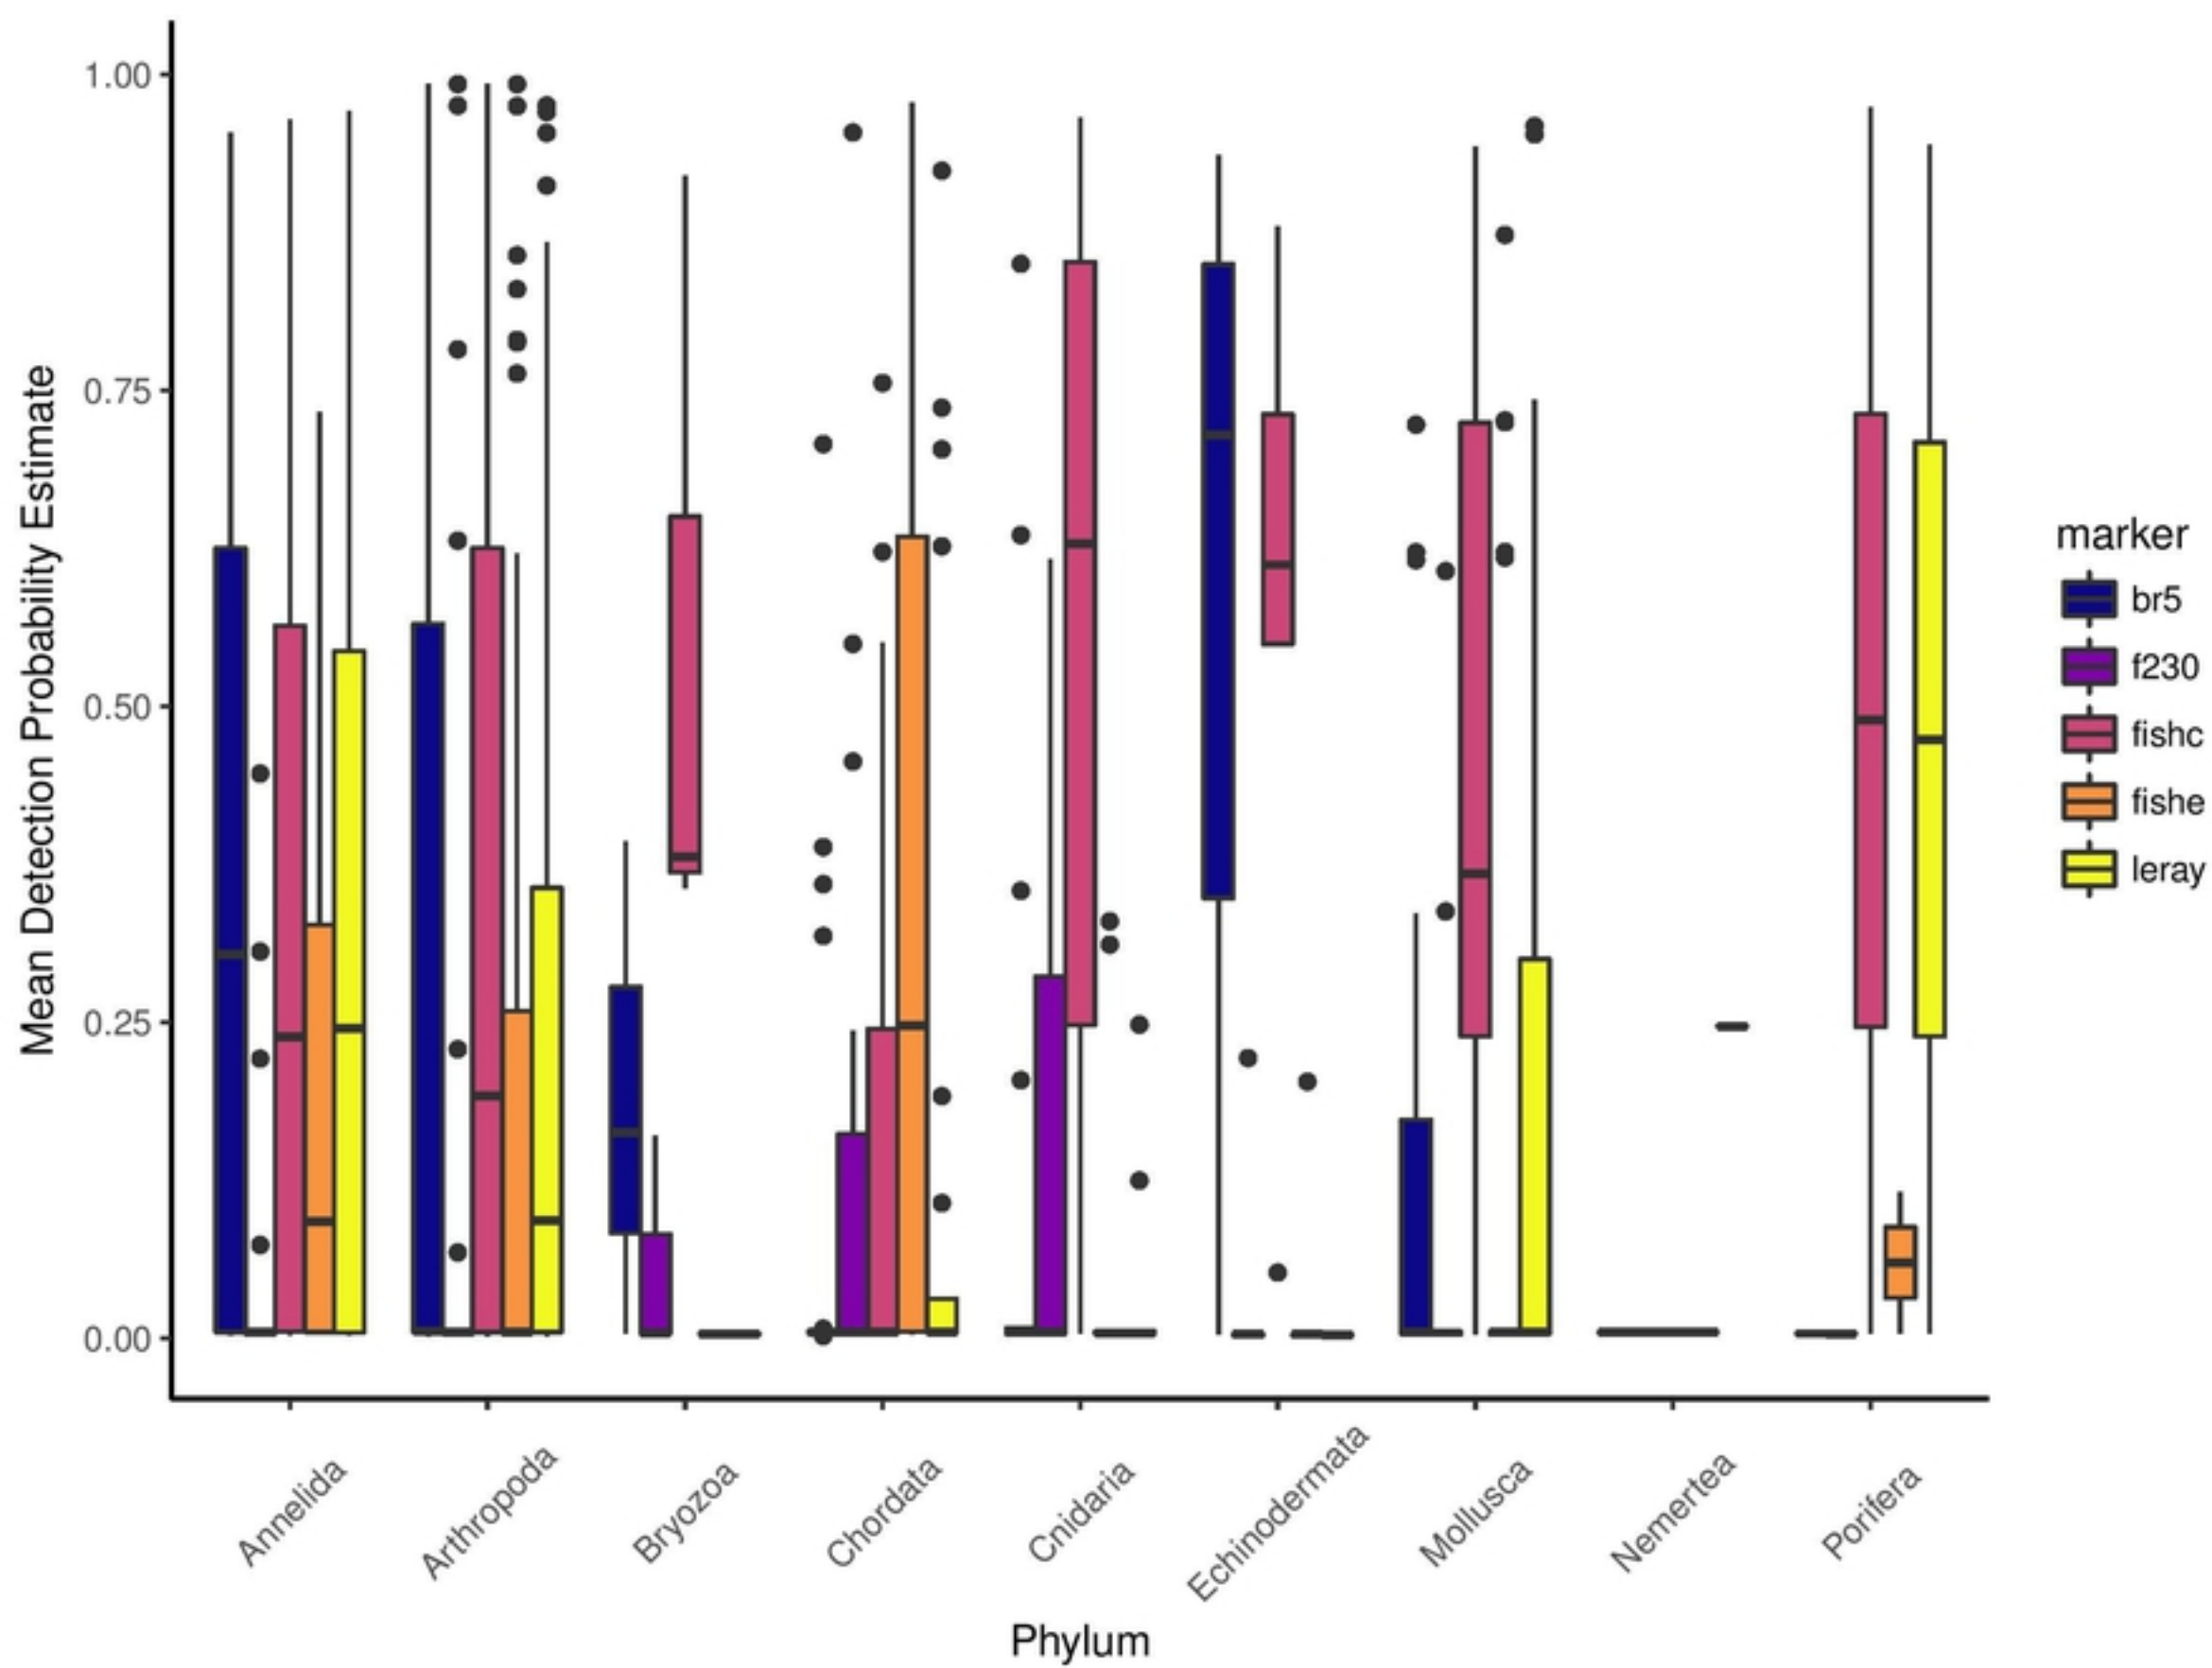

Figure 4
